# Supplementary material
Source: PubMed Central journal article supplement (PMC2823427)
Supplement: supp_M109.055178_jbc.M109.055178-1.pdf [file supp_M109.055178_jbc.M109.055178-1.pdf]

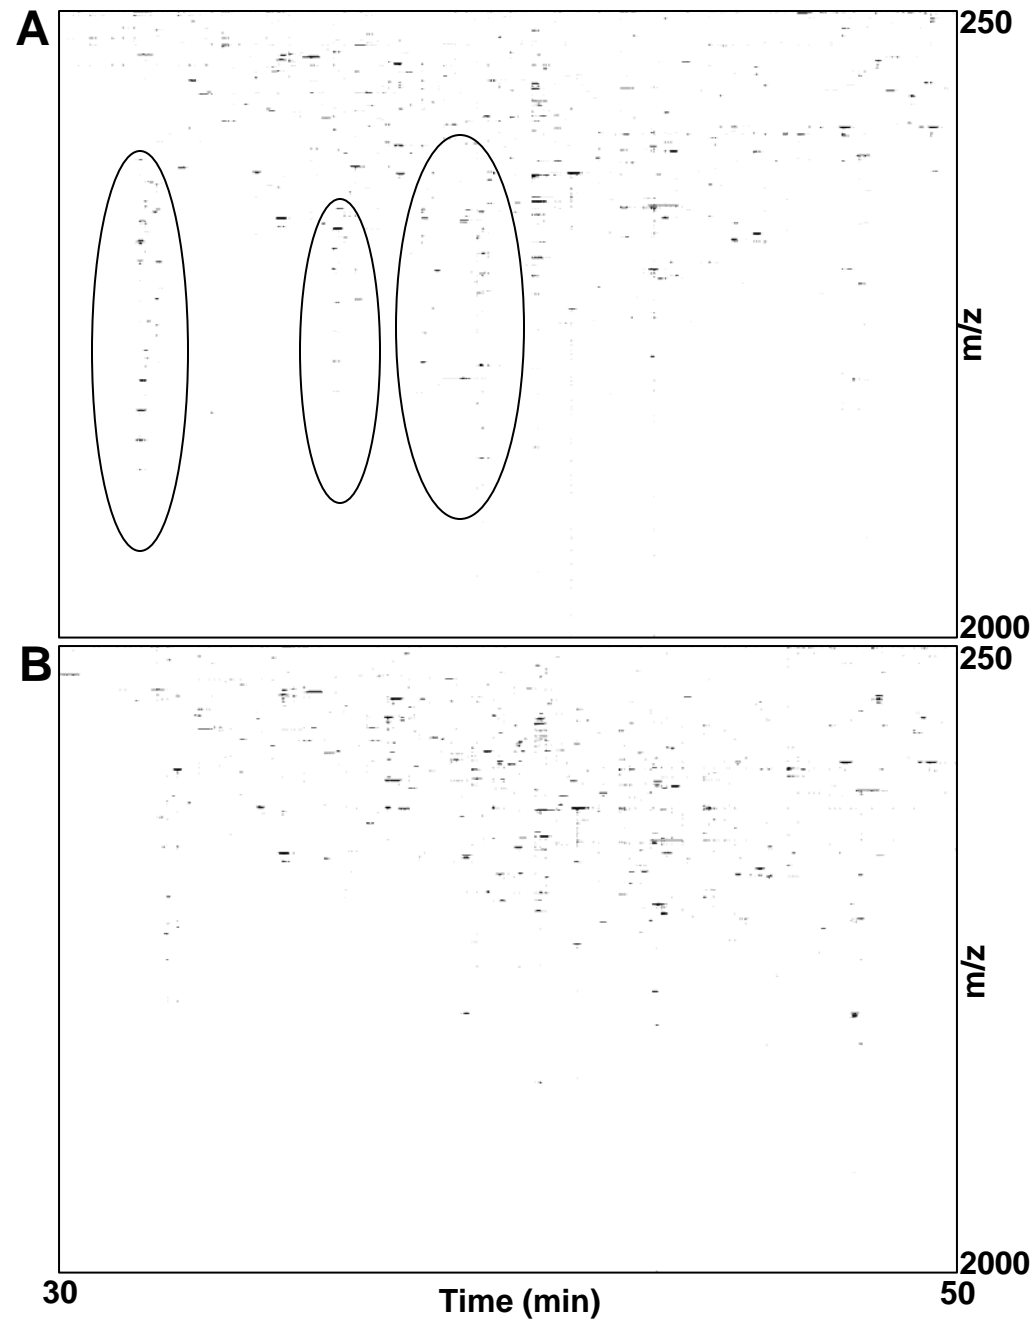

Figure 1. Density Map View of rTF<sub>1-263</sub> and rTF<sub>1-263D</sub>.

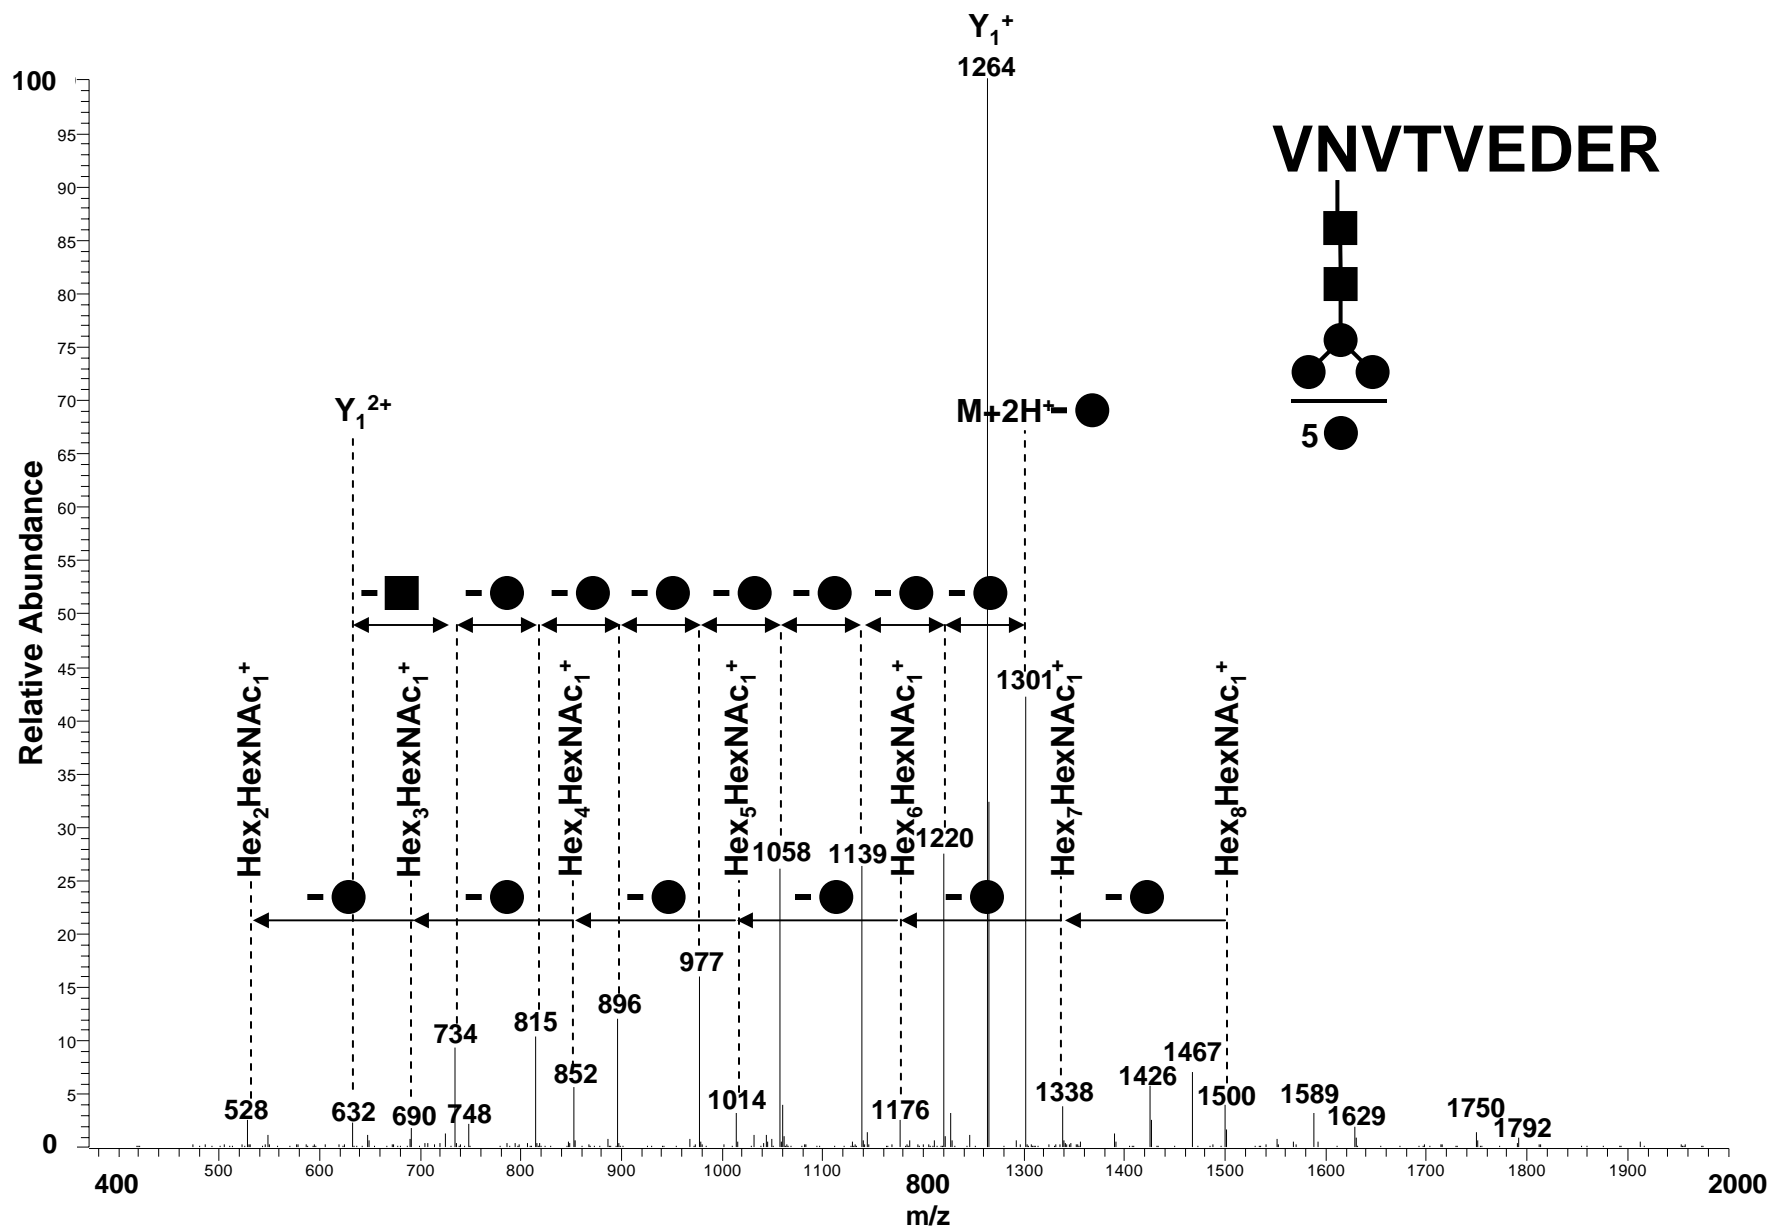

Figure 2. MS/MS Scan for m/z 1382 in rTF<sub>1-263</sub>.

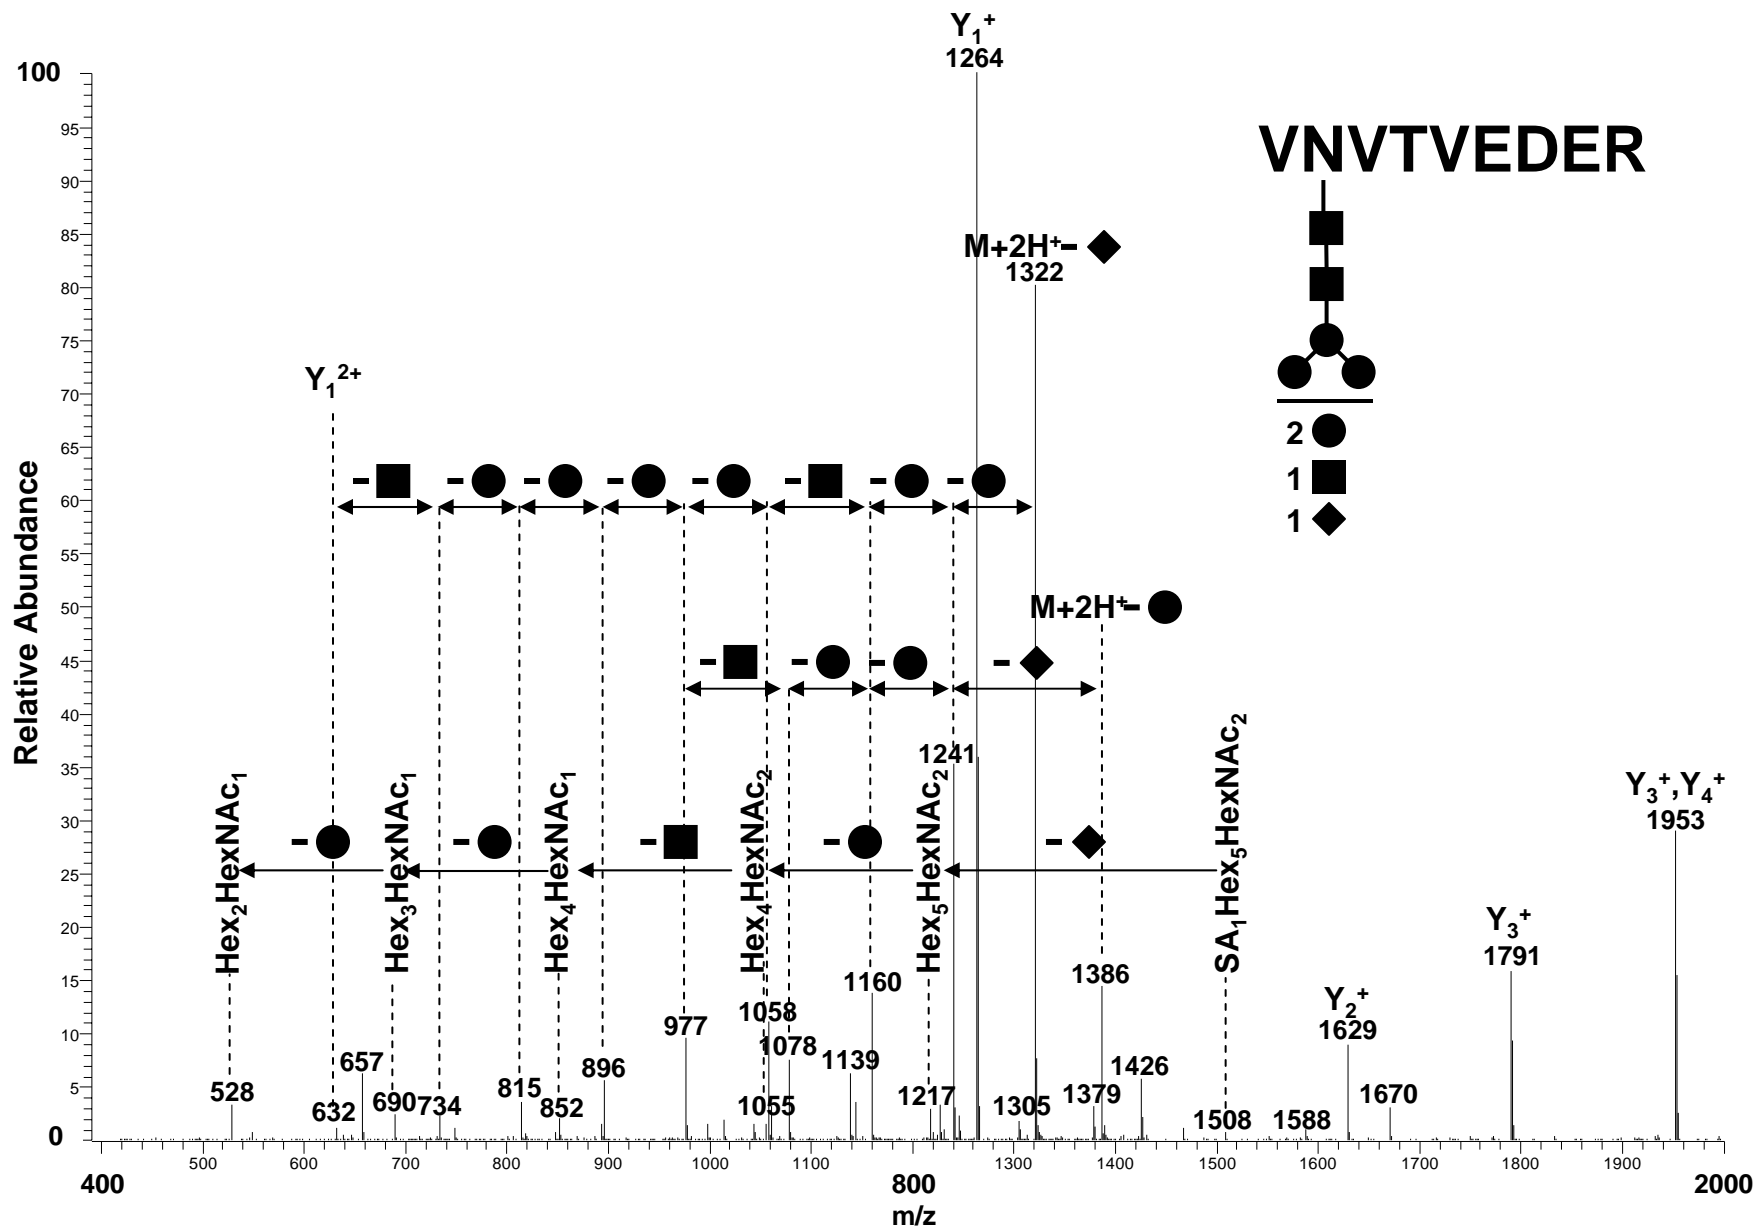

Figure 3. MS/MS Scan for m/z 1468 in pTF.
